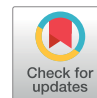

# Erratum

**Erratum. Renal Effects of DPP-4 Inhibitor Sitagliptin or GLP-1 Receptor Agonist Liraglutide in Overweight Patients With Type 2 Diabetes: A 12-Week, Randomized, Double-Blind, Placebo-Controlled Trial. *Diabetes Care* 2016;39:2042–2050**

<https://doi.org/10.2337/dc19-er03>

*Lennart Tonneijck, Mark M. Smits, Marcel H.A. Muskiet, Trynke Hoekstra, Mark H.H. Kramer, A.H. Jan Danser, Piet M. ter Wee, Michaela Diamant, Jaap A. Joles, and Daniel H. van Raalte*

On page 2048 of the article cited above, the word “increases” was corrected to read “decreases.” The new sentence reads: Notably, a decrease in plasma protein concentration decreases the ultrafiltration coefficient in order to maintain stable GFR (38), but the Gomez estimation does not include this adaptation.

The online version reflects this change.
